# Supplementary material for: Study of Anti-Inflammatory and Analgesic Activity of Scorpion Toxins DKK-SP1/2 from Scorpion Buthus martensii Karsch (BmK)
Source: MDPI journal article supplement (doi:10.3390/toxins13070498), 2021-07-17
Supplement: s1 [file s1]

## Supplementary Materials: Study of Anti-Inflammatory and Analgesic Activity of Scorpion Toxins DKK-SP1/2 from Scorpion *Buthus martensii* Karsch (*BmK*)

Yunxia Liu, Yan Li, Yuchen Zhu, Liping Zhang, Junyu Ji, Mingze Gui, Chunli Li and Yongbo Song

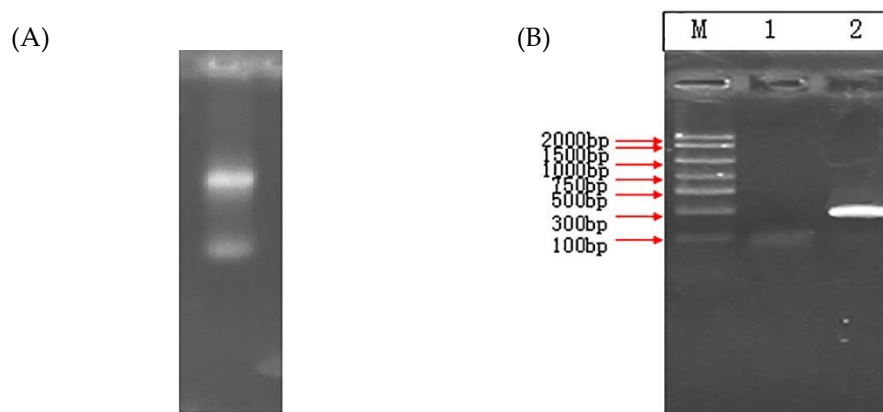

**Figure S1.** The RNA extraction and cDNA cloning. (A) Total RNA from scorpion tail. (B) The cDNA target gene of *BmK* by 1.5% agarose gel. Lane M: DL2000; Lane1: The negative as control(water); Lane2: The double-stranded target cDNA.

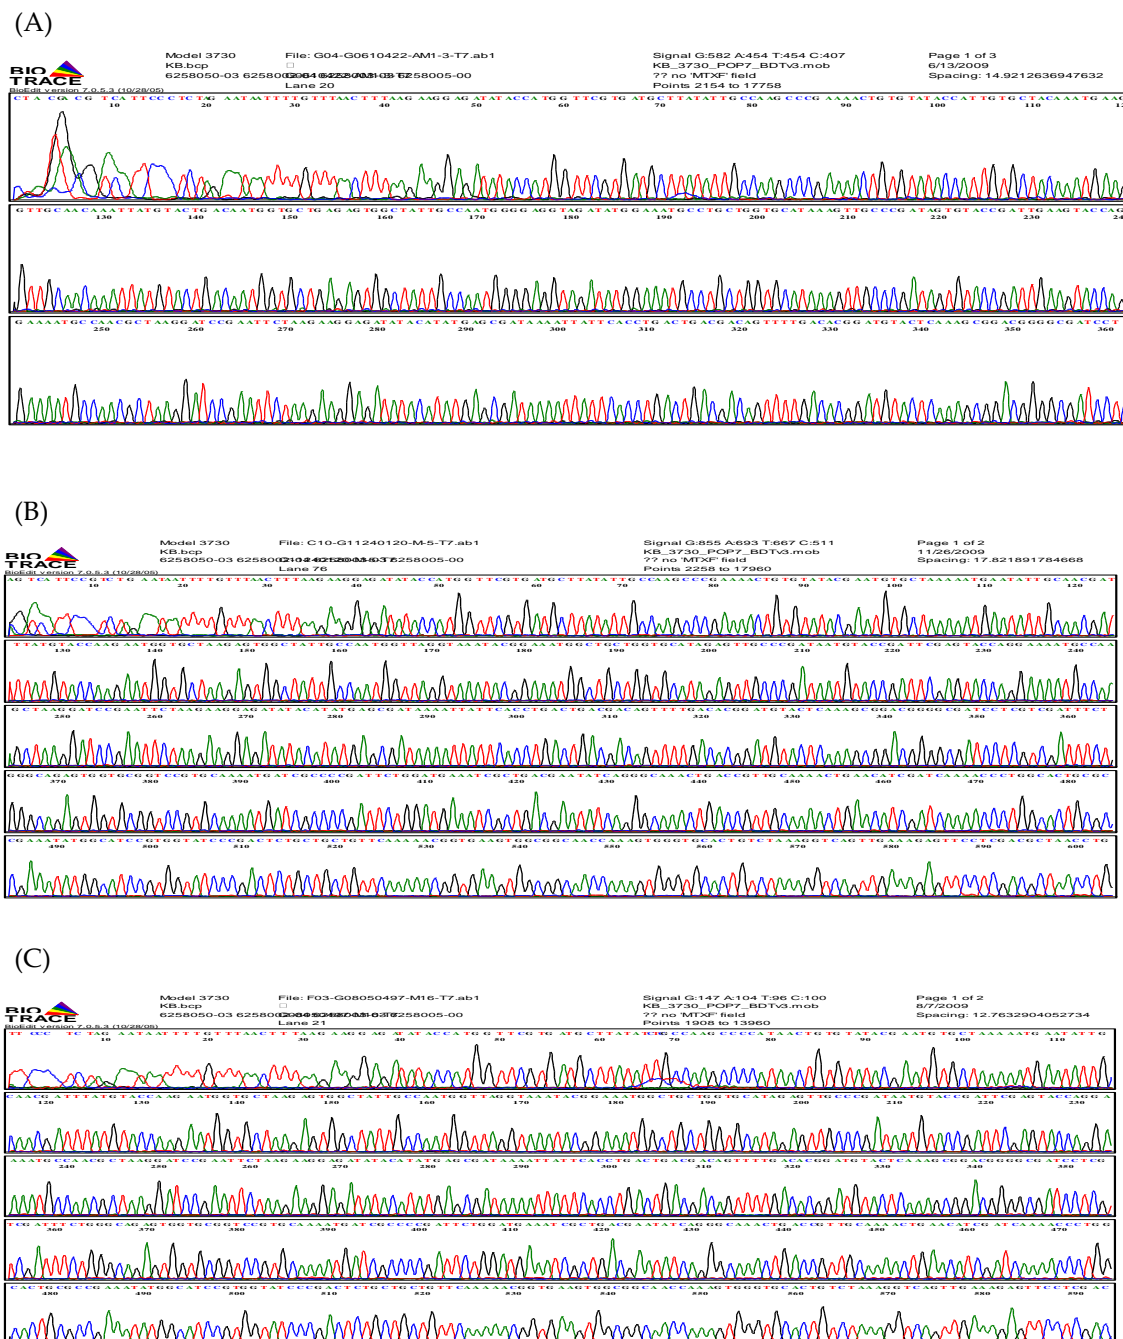

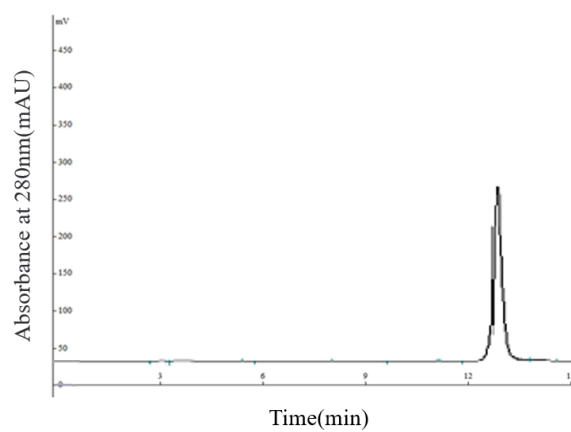

**Figure S3.** RP-HPLC of DKK-SP1 on a TSK gel Protein C4-300 column.

(A)

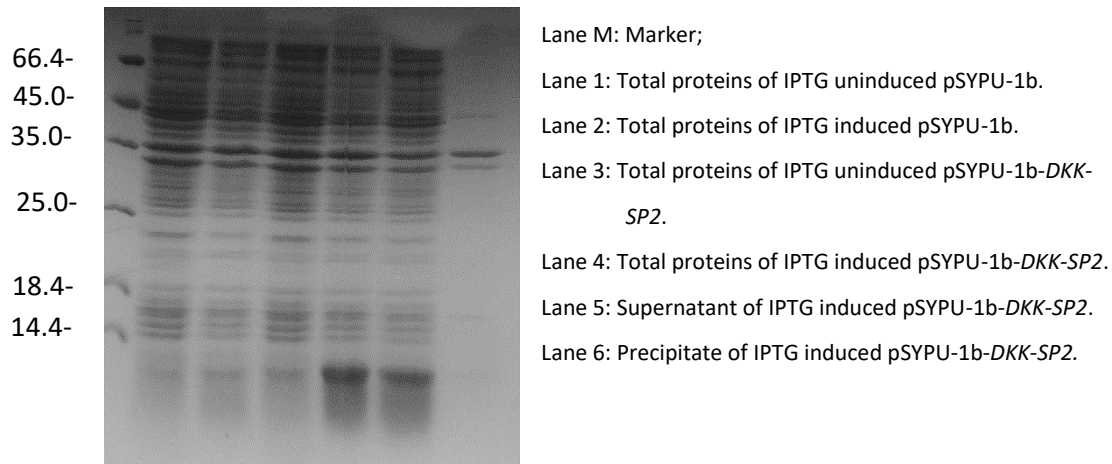

(B)

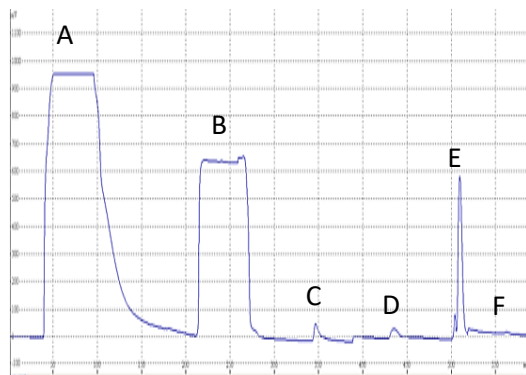

(C)

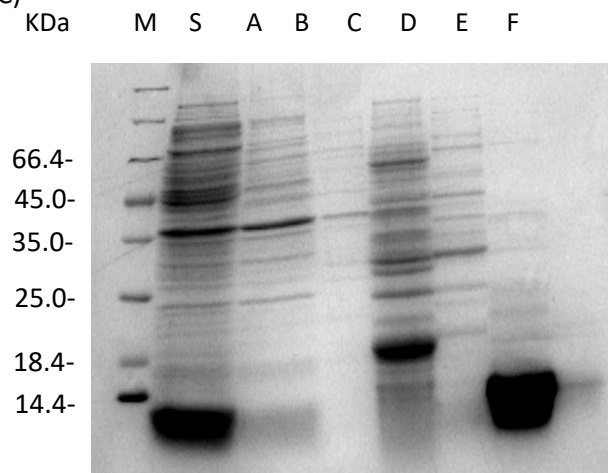

(D)

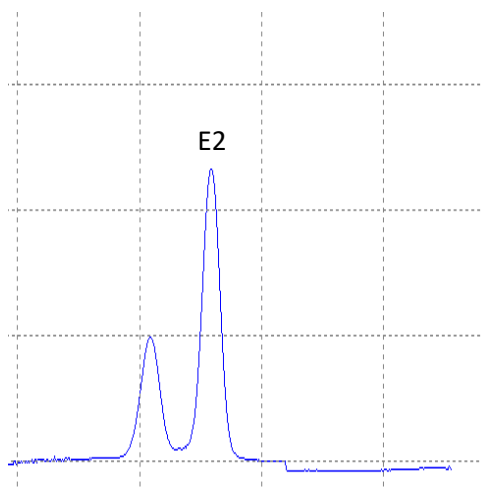

(E)

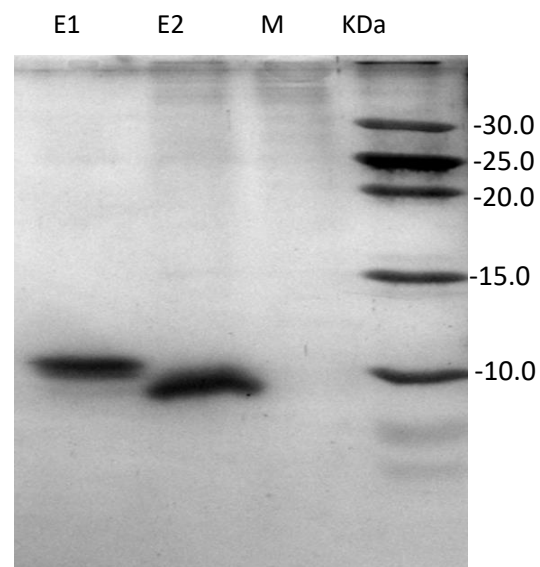

**Figure S4.** (A) 12.5% SDS-PAGE analysis of pSYPU-1b-DKK-SP2 expressed in *E. coli*. (B) The protein profiles of Nickel chelation affinity chromatography. (C) 12.5% SDS-PAGE analysis of the elution fractions in Figure S4 (B) (Lane S: Sample. Lane A: fractions in permeate. Lane B-E: the corresponding peaks of buffer B, C, E. Lane F: peak of EDTA. (D) The protein profiles of SP Sepharose High Performance chromatography. (E) 15% SDS-PAGE analysis of the elution fractions in Figure S4 (D). Lane M: Marker; Lane E1: peak of buffer E1(TrxA); Lane E2: peak of buffer E2(DKK-SP2).

(A)

KDa M 1 2 3 4

66.4-  
45.0-  
35.0-  
25.0-  
18.4-  
14.4-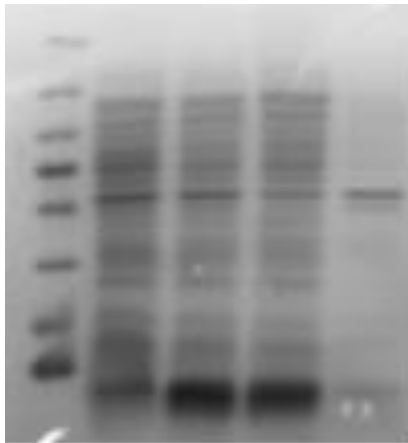

Lane M: Marker;

Lane 1: Total proteins of IPTG uninduced pSYPU-1b-DKK-SP3.

Lane 2: Total proteins of IPTG induced pSYPU-1b-DKK-SP3.

Lane 3: Supernatant of IPTG induced pSYPU-1b-DKK-SP3.

Lane 4: Precipitate of IPTG induced pSYPU-1b-DKK-SP3.

(B)

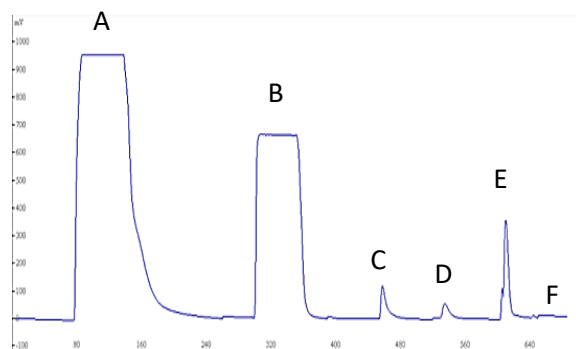

(C)

KDa M S A B C D E F

6.4-  
5.0-  
5.0-  
5.0-  
8.4-  
4.4-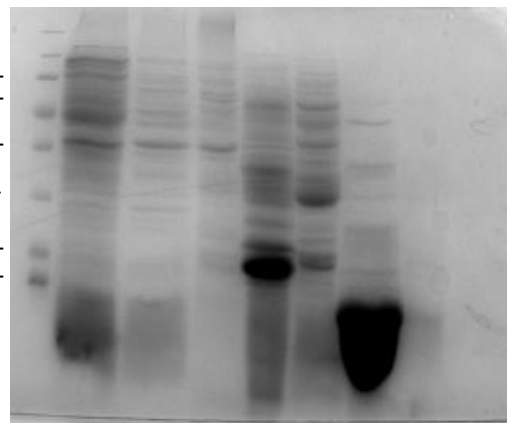

(D)

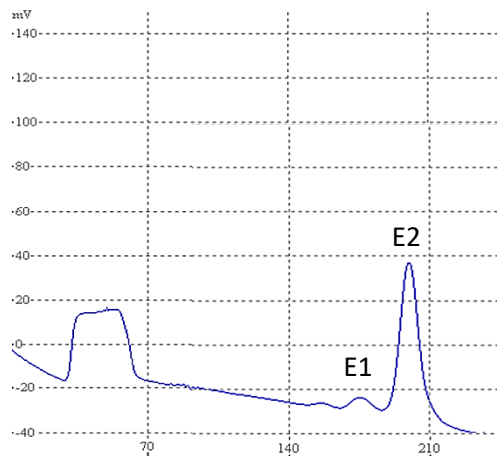

(E)

KDa M E1 E2

66.2-  
45.0-  
35.0-  
25.0-  
18.4-  
14.4-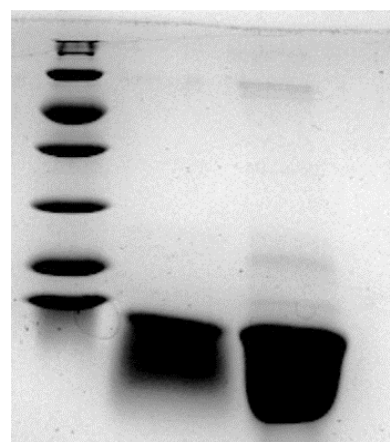

**Figure S5.** (A) 12.5% SDS-PAGE analysis of pSYPU-1b-DKK-SP3 expressed in *E. coli*. (B) The protein profiles of Nickel chelation affinity chromatography. (C) 12.5% SDS-PAGE analysis of the elution fractions in Figure S5(B) (Lane S: Sample. Lane A: fractions in permeate. Lane B-E: the corresponding peaks of buffer B, C, E. Lane F: peak of EDTA. (D) The protein profiles of SP Sepharose High Performance chromatography. (E) 15% SDS-PAGE analysis of the elution fractions in Figure S5(D). Lane M: Marker; Lane E1: peak of buffer E1(TrxA); Lane E2: peak of buffer E2(DKK-SP3).

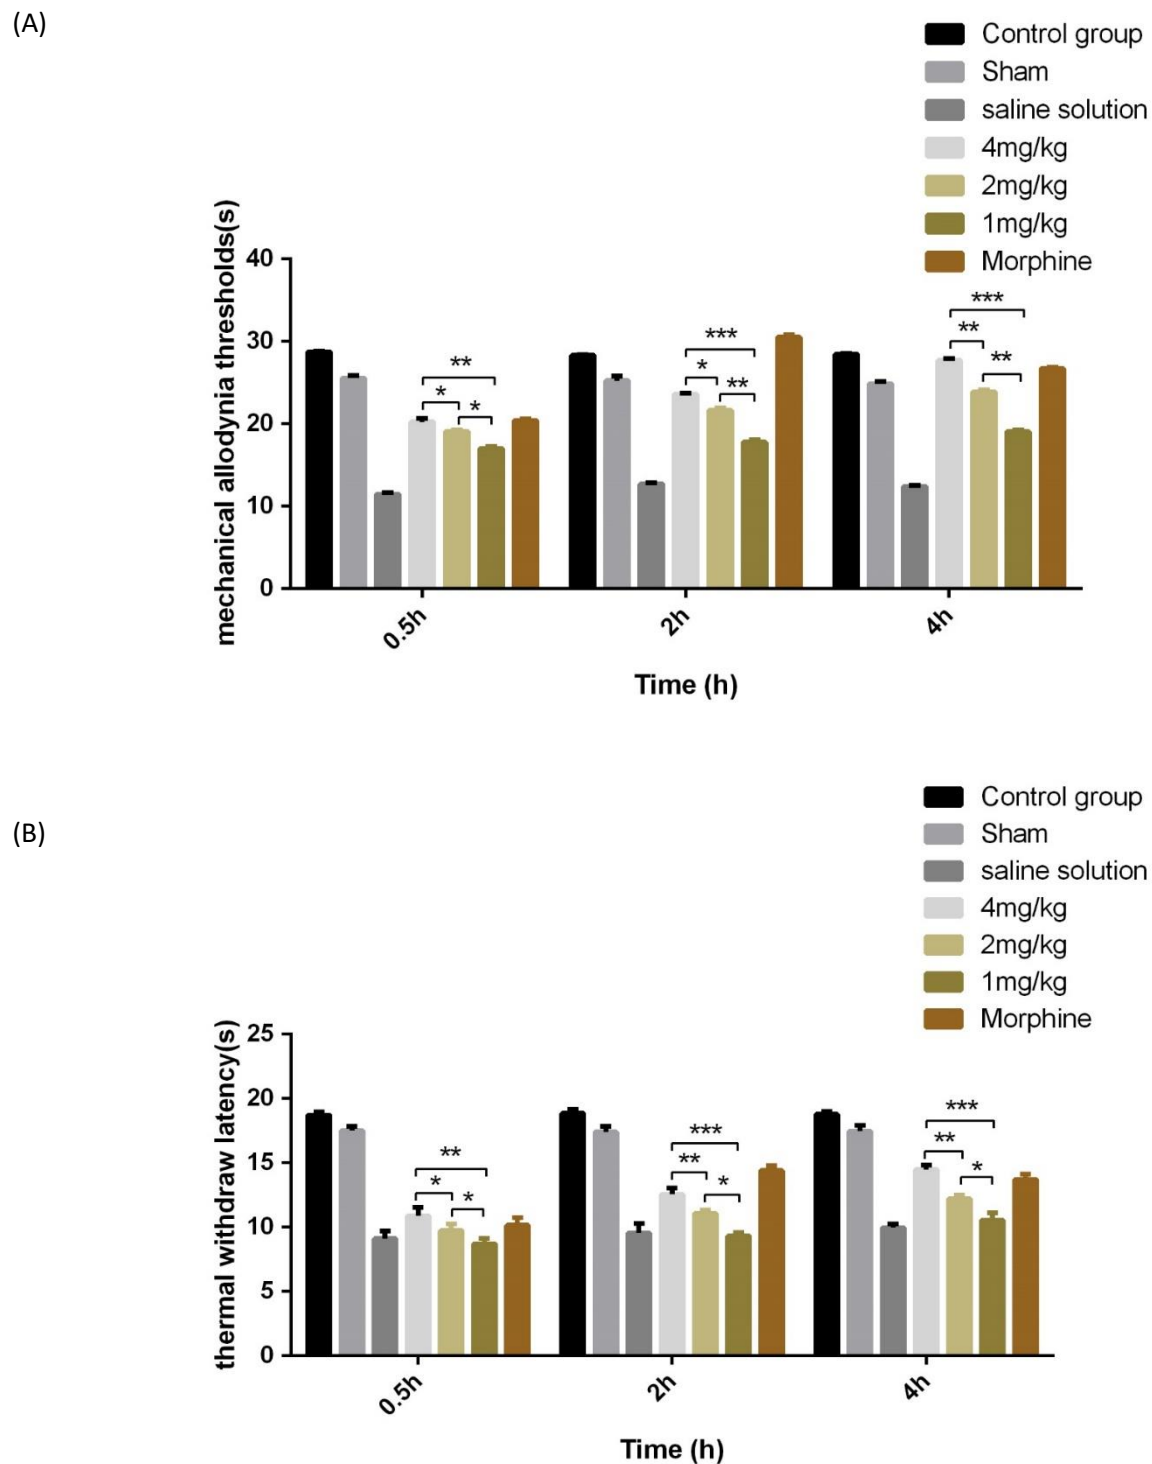

**Figure S6.** The effects of DKK-SP2 on mechanical allodynia thresholds and thermal withdraw latency were in a dose-dependent manner in a rat ION-CCI model (A) Effect of DKK-SP2 on the mechanical allodynia thresholds was in a dose-dependent manner. (B) Effect of DKK-SP2 on the thermal withdraw latency was in a dose-

dependent manner. All data was presented as mean  $\pm$  SEM.  $n = 12$ , \*  $p < 0.05$ , \*\*  $p < 0.01$ , \*\*\*  $p < 0.001$ .

**Table S1.** Effect of DKK-SP1 on mortality of mice.

| Dose (mg/kg) | Total Mice | Dead Mice | Individual Survival Time (Days)<br>(Mean Survival Time $\pm$ SEM)    | Mortality % |
|--------------|------------|-----------|----------------------------------------------------------------------|-------------|
| NS           | 12         | 0         | 14                                                                   | 0           |
| 10           | 12         | 0         | 14                                                                   | 0           |
| 15           | 12         | 2         | 10, 12, 14, 14, 14, 14, 14, 14, 14, 14, 14, 14<br>(13.67 $\pm$ 0.72) | 17          |
| 20           | 12         | 5         | 7, 8, 10, 11, 12, 14, 14, 14, 14, 14, 14, 14<br>(12.17 $\pm$ 6.14)   | 42          |
| 25           | 12         | 8         | 5, 6, 6, 7, 8, 10, 11, 12, 14, 14, 14, 14<br>(10.08 $\pm$ 11.58)     | 67          |
| 30           | 12         | 12        | 3, 3, 4, 5, 6, 7, 8, 9, 9, 11, 12, 13<br>(7.50 $\pm$ 10.75)          | 100         |

After the intravenous injection of DKK-SP1, the mortality of mice was monitored for 14 days. The results were shown in Table S1 and the LD<sub>50</sub> values was 20.57mg/kg (95%CI, 18.09~23.14mg/kg) by Bliss method.

**Table S2.** Effect of DKK-SP2 on mortality of mice.

| Dose (mg/kg) | Total Mice | Dead Mice | Individual Survival Time (Days)<br>(Mean Survival Time $\pm$ SEM)  | Mortality % |
|--------------|------------|-----------|--------------------------------------------------------------------|-------------|
| NS           | 12         | 0         | 14                                                                 | 0           |
| 10           | 12         | 0         | 14                                                                 | 0           |
| 15           | 12         | 4         | 6, 8, 10, 13, 14, 14, 14, 14, 14, 14, 14, 14<br>(12.42 $\pm$ 7.24) | 33          |
| 20           | 12         | 7         | 7, 9, 10, 10, 11, 12, 13, 14, 14, 14, 14, 14<br>(11.83 $\pm$ 5.31) | 58          |
| 25           | 12         | 10        | 4, 4, 6, 8, 8, 10, 11, 11, 13, 13, 14, 14<br>(9.67 $\pm$ 12.22)    | 83          |
| 30           | 12         | 12        | 2, 3, 5, 5, 6, 7, 7, 9, 9, 10, 12, 13<br>(7.33 $\pm$ 10.56)        | 100         |

After the intravenous injection of DKK-SP2, the mortality of mice was monitored for 14 days. The results were shown in Table S2 and the LD<sub>50</sub> values was 18.09 mg/kg (95%CI, 15.63~20.38mg/kg) by Bliss method.

**Table S3.** Effect of DKK-SP3 on mortality of mice.

| Dose (mg/kg) | Total Mice | Dead Mice | Individual Survival Time (Days)<br>(Mean Survival Time $\pm$ SEM)      | Mortality % |
|--------------|------------|-----------|------------------------------------------------------------------------|-------------|
| NS           | 12         | 0         | 14                                                                     | 0           |
| 0.7          | 12         | 0         | 14                                                                     | 0           |
| 2.1          | 12         | 2         | 9, 11, 14, 14, 14, 14, 14, 14,<br>14, 14, 14, 14<br>(13.33 $\pm$ 2.39) | 17          |
| 3.5          | 12         | 4         | 7, 9, 11, 12, 14, 14, 14, 14,<br>14, 14, 14, 14<br>(12.58 $\pm$ 5.24)  | 33          |
| 4.9          | 12         | 9         | 3, 5, 6, 7, 9, 10, 11, 13, 13,<br>14, 14, 14<br>(9.92 $\pm$ 13.91)     | 75          |
| 6.3          | 12         | 12        | 2, 3, 3, 4, 5, 5, 6, 8, 8, 9, 11,<br>12<br>(6.33 $\pm$ 9.72)           | 100         |

After the intravenous injection of DKK-SP3, the mortality of mice was monitored for 14 days. The results were shown in Table S3 and the LD<sub>50</sub> values was 4.31mg/kg (95%CI, 3.63~5.00mg/kg) by Bliss method.

**Table S4.** Effect of DKK-SP2 on acetic acid writhing test.

| Group   | Dose/mg·kg <sup>-1</sup> | Writhing times   | Inhibition rate/% |
|---------|--------------------------|------------------|-------------------|
| NS      | --                       | 38.4 $\pm$ 2.0   | --                |
|         | 0.2                      | 39.0 $\pm$ 2.1   | 0.0               |
| DKK-SP2 | 0.8                      | 25.5 $\pm$ 2.8*  | 33.6              |
|         | 1.4                      | 10.1 $\pm$ 3.7** | 73.7              |
|         | 2.0                      | 8.2 $\pm$ 3.4*** | 78.6              |
|         | 2.6                      | 1.6 $\pm$ 2.3*** | 95.8              |
|         | 3.2                      | 0.0 $\pm$ 0.0    | 100.0             |

The results are shown in Table S4, from which it can be measured that the half effective dose (ED<sub>50</sub>) of DKK-SP2 is 1.04mg/kg (95%CI, 0.78~1.26mg/kg) by Bliss method. All data was presented as mean  $\pm$  SEM.  $n = 12$ , \*  $p < 0.05$ , \*\*  $p < 0.01$ , \*\*\*  $p < 0.001$ .
